# Supplementary material for: Aberrant Expression of Posterior HOX Genes in Well Differentiated Histotypes of Thyroid Cancers
Source: Int J Mol Sci. 2013 Nov 1;14(11):21727–40. doi: 10.3390/ijms141121727 (PMC3856031; doi:10.3390/ijms141121727)
Supplement: Supplementary file 1 [file ijms-14-21727-s001.pdf]

## Supplementary Information

**Table S1.** Nuclear and cytoplasmic paralogous group 13 *HOX* genes expression in normal, adenoma and tumor phenotypes of thyroid. Kruskal Wallis Test (\* significant values).

|                                 | Median | Normal | Adenoma | Papillary | Papil/Foll | Follicular | Kruskal Wallis Test |
|---------------------------------|--------|--------|---------|-----------|------------|------------|---------------------|
| <i>HOX A13</i> _nuclEmembr_PRIM | >      | 0      | 0       | 14        | 11         | 6          | 0.000118 * 1        |
|                                 | <=     | 6      | 6       | 12        | 6          | 1          |                     |
| <i>HOX A13</i> Citop. PRIM.     | >      | 0      | 1       | 5         | 1          | 1          | 0.642506 2          |
|                                 | <=     | 6      | 5       | 21        | 16         | 6          |                     |
| <i>HOX B13</i> Nucl. PRIM.      | >      | 6      | 6       | 9         | 7          | 2          | 0.001318 * 3        |
|                                 | <=     | 0      | 0       | 16        | 10         | 5          |                     |
| <i>HOX B13</i> Citop. PRIM.     | >      | 3      | 3       | 13        | 8          | 2          | 0.810714 4          |
|                                 | <=     | 3      | 3       | 12        | 9          | 5          |                     |
| <i>HOX C13</i> _nuclEmembr_PRIM | >      | 0      | 3       | 13        | 7          | 3          | 0.002118 * 5        |
|                                 | <=     | 6      | 3       | 13        | 10         | 4          |                     |
| <i>HOX C13</i> Citop. PRIM.     | >      | 0      | 2       | 14        | 9          | 4          | 0.001367 * 6        |
|                                 | <=     | 6      | 4       | 12        | 8          | 3          |                     |
| <i>HOX D13</i> _nuclEmembr_PRIM | >      | 0      | 1       | 10        | 7          | 3          | 0.275741 7          |
|                                 | <=     | 6      | 5       | 16        | 10         | 4          |                     |
| <i>HOX D13</i> Citop. PRIM.     | >      | 0      | 1       | 13        | 10         | 6          | 0.00026 * 8         |
|                                 | <=     | 6      | 5       | 13        | 7          | 1          |                     |

**Table S2.** Comparison between the nuclear and cytoplasmic expression of paralogous group 13 *HOX* genes associated in pairs. Wilcoxon Signed ranks Test.

|                                   | Nuclear expression | Direction | Cytoplasmic Expression | Direction |
|-----------------------------------|--------------------|-----------|------------------------|-----------|
| <i>HOX A13</i> vs. <i>HOX B13</i> | 0.033470126        | Up        | <0.001                 | Down      |
| <i>HOX A13</i> vs. <i>HOX C13</i> | 0.192198107        | Up        | <0.001                 | Down      |
| <i>HOX A13</i> vs. <i>HOX D13</i> | <0.001             | Up        | <0.001                 | Down      |
| <i>HOX B13</i> vs. <i>HOX C13</i> | 0.183660561        | Down      | <0.001                 | Up        |
| <i>HOX B13</i> vs. <i>HOX D13</i> | <0.001             | Up        | <0.001                 | Up        |
| <i>HOX C13</i> vs. <i>HOX D13</i> | <0.001             | Up        | <0.001                 | Up        |

**Table S3.** Paralogous group 13 *HOX* genes expression in primary tumors versus lymph node metastases. Wilcoxon Signed Ranks Test.

| Ranks nuclear  | N | p-Value | Ranks cytoplasmic | N | p-Value |
|----------------|---|---------|-------------------|---|---------|
| <i>HOX A13</i> |   |         | <i>HOX A13</i>    |   |         |
| MTX < Primary  | 8 | 0.24    | MTX < Primary     | 1 | 0.33    |
| MTX > Primary  | 4 |         | MTX > Primary     | 4 |         |
| MTX = Primary  | 2 |         | MTX = Primary     | 9 |         |
| <i>HOX B13</i> |   |         | <i>HOX B13</i>    |   |         |
| MTX < Primary  | 6 | 0.92    | MTX < Primary     | 5 | 0.9     |
| MTX > Primary  | 6 |         | MTX > Primary     | 5 |         |
| MTX = Primary  | 2 |         | MTX = Primary     | 4 |         |
| <i>HOX C13</i> |   |         | <i>HOX C13</i>    |   |         |
| MTX < Primary  | 6 | 0.8     | MTX < Primary     | 2 | 0.65    |
| MTX > Primary  | 7 |         | MTX > Primary     | 5 |         |
| MTX = Primary  | 1 |         | MTX = Primary     | 7 |         |
| <i>HOX D13</i> |   |         | <i>HOX D13</i>    |   |         |
| MTX < Primary  | 5 | 0.88    | MTX < Primary     | 9 | 0.47    |
| MTX > Primary  | 5 |         | MTX > Primary     | 5 |         |
| MTX = Primary  | 4 |         | MTX = Primary     | 0 |         |

© 2013 by the authors; licensee MDPI, Basel, Switzerland. This article is an open access article distributed under the terms and conditions of the Creative Commons Attribution license (<http://creativecommons.org/licenses/by/3.0/>).
